# Supplementary material for: Ru-promoted perovskites as effective redox catalysts for CO2 splitting and methane partial oxidation in a cyclic redox scheme
Source: Royal Society of Chemistry journal article supplement (doi:10.1039/d2nr04437d), 2022-01-01
Supplement: d2nr04437d1.pdf [file d2nr04437d1.pdf]

## Ru-promoted perovskites as effective redox catalysts for CO<sub>2</sub> splitting and methane partial oxidation in a cyclic redox scheme

Sherafghan Iftikhar<sup>1</sup>, William Martin<sup>1</sup>, Xijun Wang<sup>1</sup>, Junchen Liu<sup>1</sup>, Yunfei Gao<sup>1,2</sup>, and Fanxing Li<sup>1\*</sup>

<sup>1</sup> Department of Chemical and Biomolecular Engineering, North Carolina State University, Raleigh, NC 27695-7905, United States

<sup>2</sup>Key Laboratory of Coal Gasification and Energy Chemical Engineering of Ministry of Education, Shanghai Engineering Research Center of Coal Gasification, East China University of Science and Technology, Shanghai 200237, PR China

[\\*fli5@ncsu.edu](mailto:fli5@ncsu.edu)

### This file includes:

- Supplementary text
- Fig. S1: DTG profiles of (a) LFM during CH<sub>4</sub>-TPR, (b) Ru-LFM during CH<sub>4</sub>-TPR, (c) LFM during CO<sub>2</sub>-TPO, (d) Ru-LFM during CO<sub>2</sub>-TPO, (e) LFM during H<sub>2</sub>-TPR, and (f) Ru-LFM during H<sub>2</sub>-TPR.
- Fig. S2: Fitting chart of the weight loss peaks for TPR/TPO experiments in Fig. S1 (R<sup>2</sup> ~ 0.85-0.99).
- Fig. S3: XRD spectra of LFM and Ru-impregnated LFM samples.
- Fig. S4: Weight loss/gain during CH<sub>4</sub> -TPR and CO<sub>2</sub> -TPO of Ru-LFM sample
- Fig. S5: H<sub>2</sub> / CO ratio during 120 cycles over Ru-LFM.
- Fig. S6: EDS mapping of fresh, post-100 cycles, and post-O<sub>2</sub> TPO Ru-LFM samples.

### Supplementary text:

### Definitions of conversions and selectivity:

$$CH_4 \text{ Conversion} = 100 \times \frac{CH_{4,in} - CH_{4,out}}{CH_{4,in}}$$

$$CO \text{ Selectivity} = 100 \times \frac{CO_{out}}{CO_{out} + CO_{2,out}}$$

$$CO_2 \text{ Conversion} = 100 \times \frac{CO_{2,in} - CO_{2,out}}{CO_{2,in}}$$

**Thermodynamics analysis of methane POx and CO<sub>2</sub>-Splitting reactions:** The dotted black lines in the Ellingham diagram (Fig.2) correspond to the variation of  $\Delta G$  with the temperature at a given  $P_{O_2}$  and these lines were drawn by using the following equation:

$$\Delta G = -RT \ln P_{O_2} \quad (E1)$$

Theoretical CO<sub>2</sub> conversion was calculated using the following set of equations:

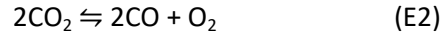

$$K = \frac{P_{O_2} \left( \frac{P_{CO}}{P_{CO_2}} \right)^2}{P_o} \quad (E3)$$

$$CO_2 \text{ Conversion} = 100 \times \frac{\frac{P_{CO}}{P_{CO_2} + P_{CO}}}{1 + \frac{P_{CO}}{P_{CO_2}}} \quad (E4)$$

$$CO_2 \text{ Conversion} = 100 \times \frac{\frac{P_{CO}}{P_{CO_2}}}{1 + \frac{P_{CO}}{P_{CO_2}}} \quad (E5)$$

$$CO_2 \text{ Conversion} = 100 \times \frac{\frac{\sqrt{K}}{\sqrt{K} + \sqrt{\frac{P_{O_2}}{P_o}}}}{\sqrt{K} + \sqrt{\frac{P_{O_2}}{P_o}}} \quad (E6)$$

### Calculation of Gibbs free energy change ( $\Delta G$ )

Gibbs free energy change ( $\Delta G$ ) can be related to  $P_{O_2}$  (or oxygen chemical potential,  $u_{O_2}$ ) within specified  $\delta$  ranges.  $A_x A'_{1-x} B_y B'_{1-y} O_{3-\delta}$  oxygen carriers' redox thermodynamics can be described by their incremental Gibbs free energy as  $\Delta G_{\delta 1 \rightarrow \delta 2} = \Delta G_{\delta 2} - \Delta G_{\delta 1} + \left( \frac{\delta 2 - \delta 1}{2} \right) u_{O_2}$ , where  $\delta 1 \rightarrow \delta 2$  represent the

change of  $\delta$  value from  $\delta_1$  to  $\delta_2$ . The slope of the  $\delta$  vs.  $G$  curve thus describe the  $u_{O_2}$  within a vacancy concentration range at a given temperature. They can in turn be used to determine the feasibility and capacity of oxygen uptake and release within a given  $P_{O_2}$  and/ or temperature swings. As one can anticipate, too large or too small  $\Delta G_{\delta_1 \rightarrow \delta_2}$  will lead to less or over stable configurations. Therefore, a suitable  $\Delta G_{\delta_1 \rightarrow \delta_2}$  within an optimal range over a large  $\delta$  span would lead to a larger oxygen capacity. Previous experiments indicate that  $\delta$  usually varies in the range of 0.25– 0.5 in chemical processes. It is also noted that every 0.125 change in  $\delta$  correspond to roughly 1 wt% oxygen capacity.

### Calculation of activations energies

Activation energies for the  $CH_4$ -POx and  $CO_2$  splitting reactions were calculated using the Kissinger method:

$$\ln(\gamma T_p^{-2}) = -E_a(RT_o)^{-1} + \ln(AR E_a^{-1})$$

Where  $\gamma$ ,  $T_p$ ,  $A$ ,  $R$  and  $E_a$  represents the heating rate ( $^{\circ}K/min$ ), peak temperature (K), pre-exponential factor, general gas constant(J/mol.K), and the activation energy (kJ/mol), respectively. Various heating rates and peak temperatures from the Fig. S3 were fitted to determine the activation energies as indicated in the Fig. S4.

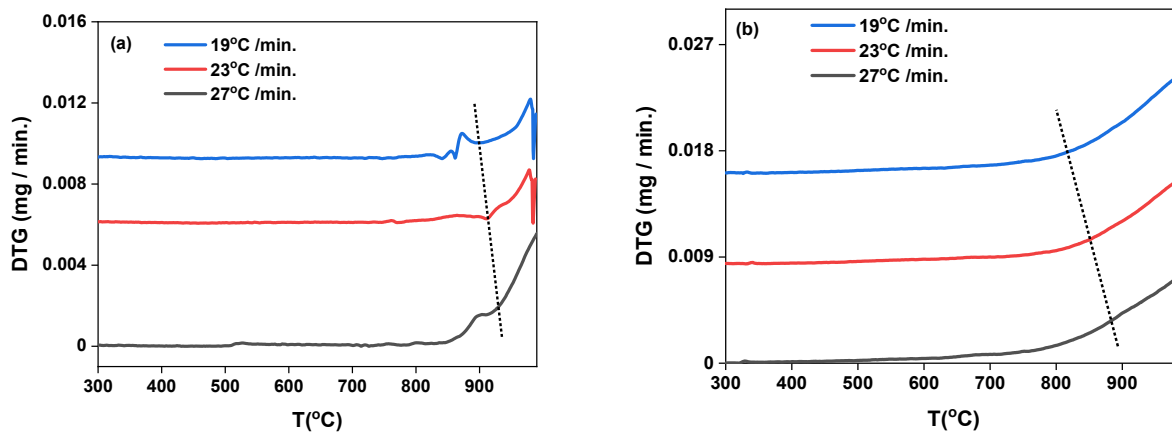

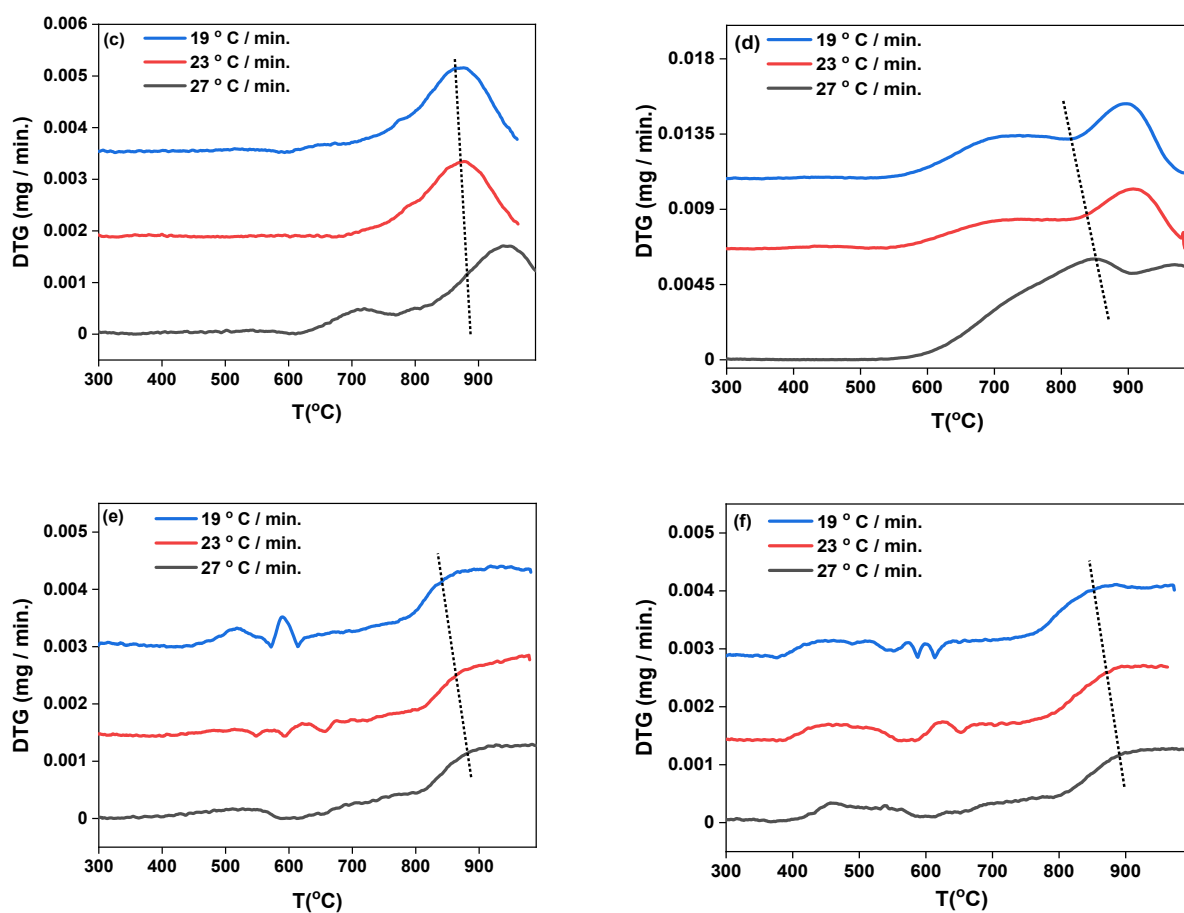

Fig. S1: DTG profiles of (a) LFM during CH<sub>4</sub>-TPR, (b) Ru-LFM during CH<sub>4</sub>-TPR, (c) LFM during CO<sub>2</sub>-TPO, (d) Ru-LFM during CO<sub>2</sub>-TPO, (e) LFM during H<sub>2</sub>-TPR, and (f) Ru-LFM during H<sub>2</sub>-TPR.

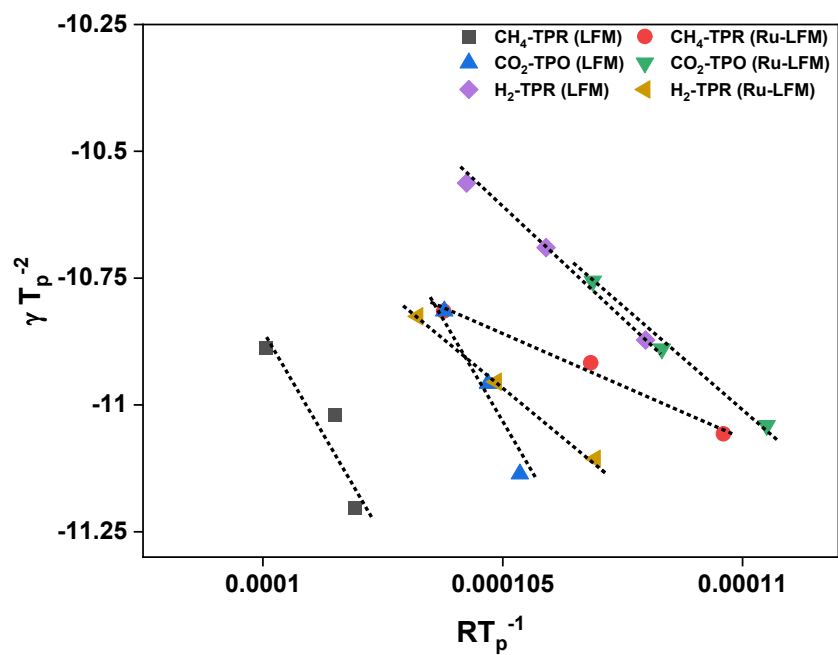

Fig. S2: Fitting chart of the weight loss peaks for TPR/TPO experiments in Fig. S3

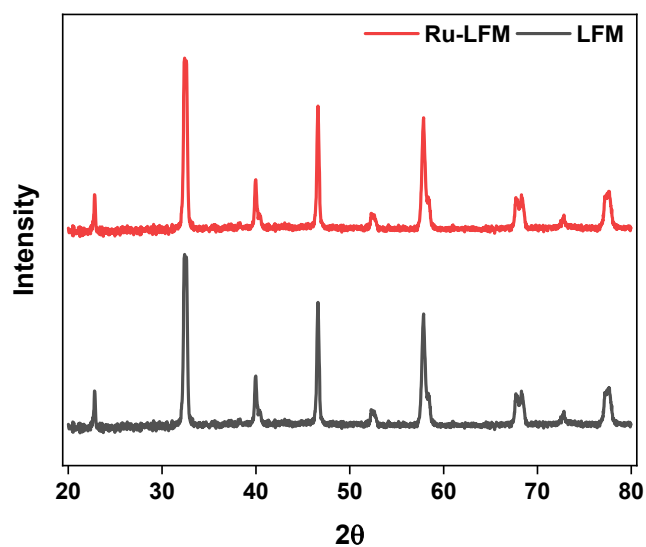

Fig. S3: XRD spectra of LFM and Ru impregnated LFM samples.

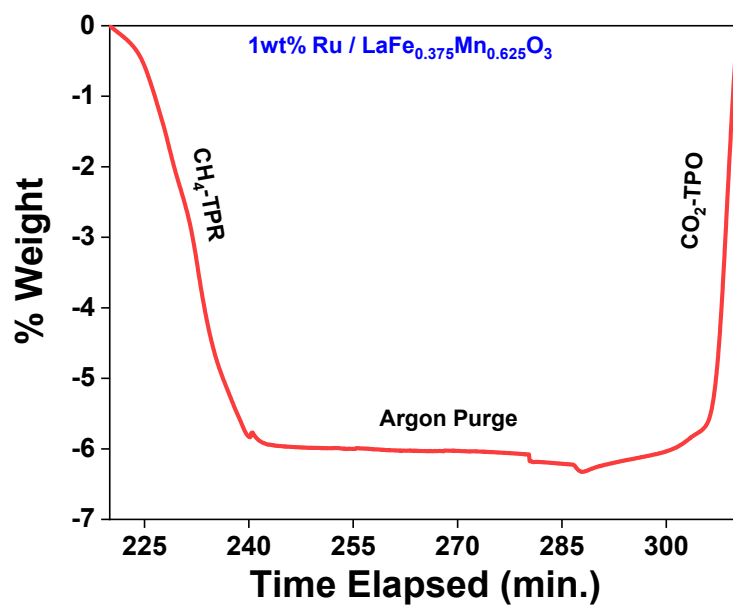

Fig. S4: Weight loss/gain during CH<sub>4</sub>-TPR and CO<sub>2</sub>-TPO of Ru-LFM sample.

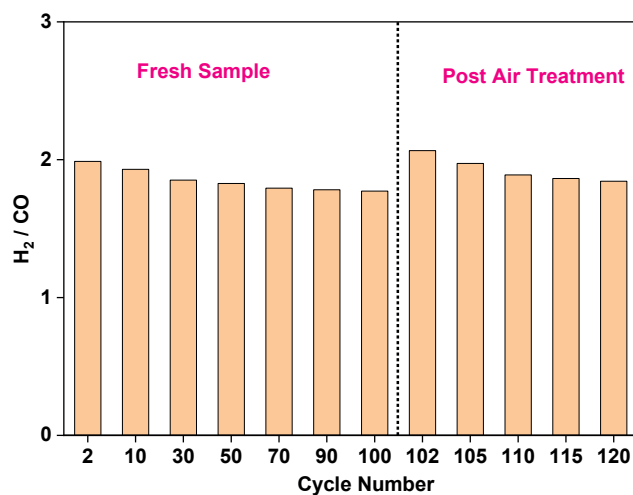

Fig. S5: H<sub>2</sub>/CO ratio during 120 cycles over Ru-LFM

Fresh Ru-LFM

Post-100 Cycles Ru-LFM

Post O<sub>2</sub>-TPO Ru-LFM

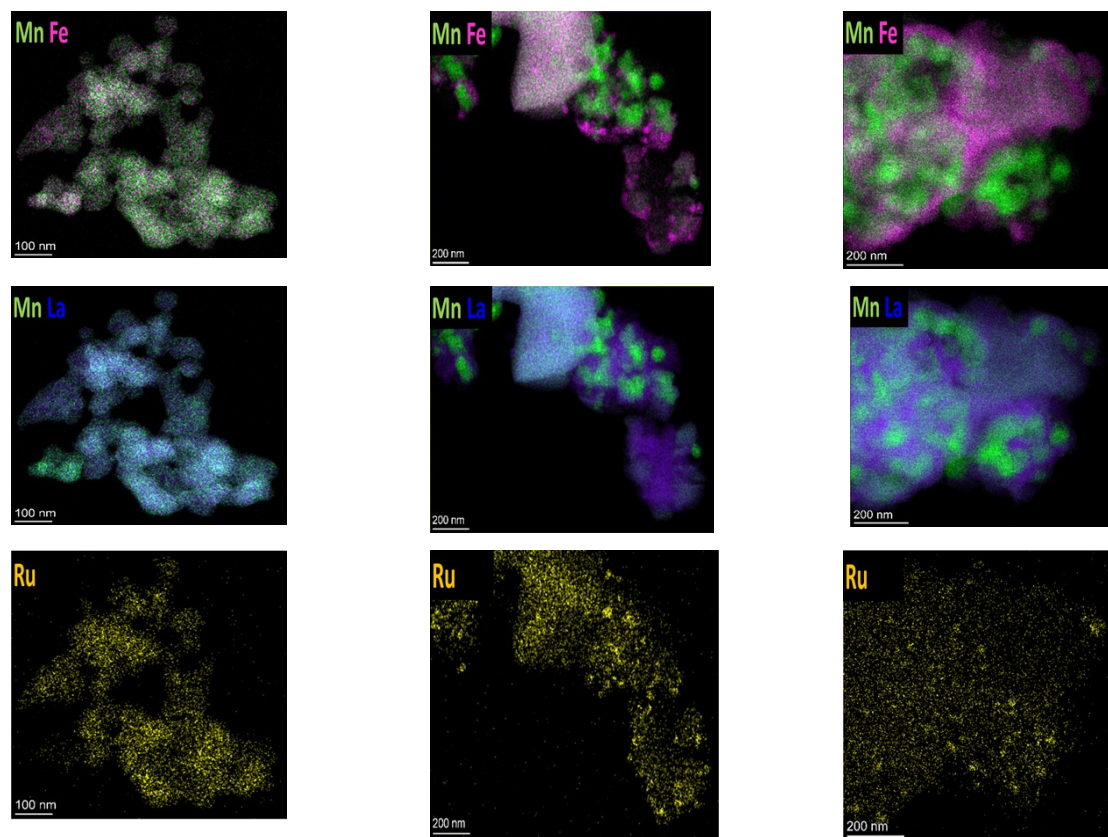

*Fig. S6: EDS mapping of fresh, post-100 cycles, and post-O<sub>2</sub> TPO Ru-LFM samples.*
